# Supplementary material for: C-Phycocyanin and Lycium barbarum Polysaccharides Protect against Aspirin-Induced Inflammation and Apoptosis in Gastric RGM-1 Cells
Source: MDPI journal article supplement (doi:10.3390/nu14235113), 2022-12-01
Supplement: s1 [file s1]

## C-Phycocyanin and *Lycium barbarum* Polysaccharides Protect against Aspirin-Induced Inflammation and Apoptosis in Gastric RGM-1 Cells

Yu-Chen Liu <sup>1</sup>, Chun-Chao Chang <sup>2,3,4</sup>, Hirofumi Matsui <sup>5</sup> and Jane C.-J. Chao <sup>1,4,6,7,\*</sup>

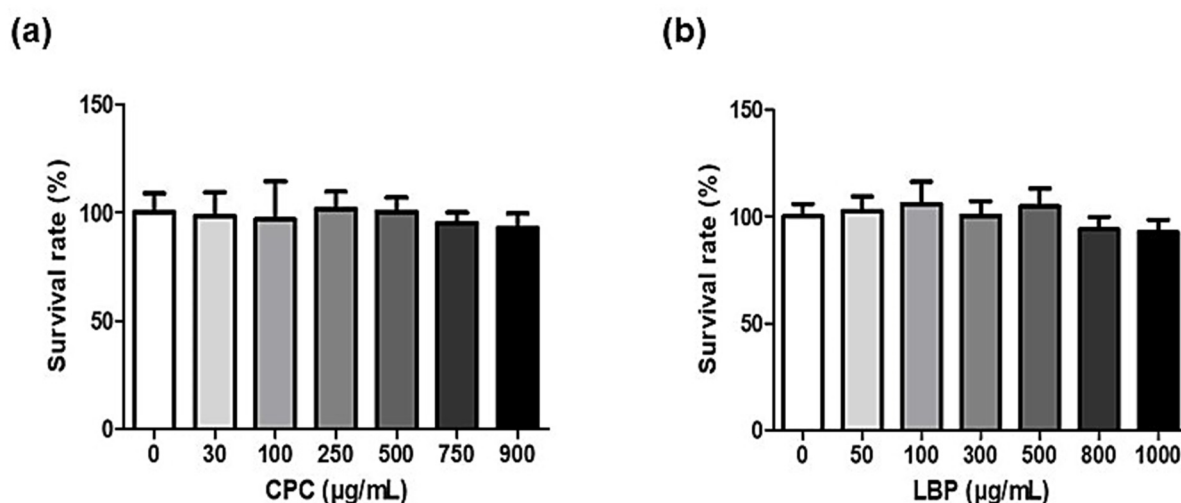

**Figure 1.** Effects of (a) C-phycocyanin (CPC) or (b) *Lycium barbarum* polysaccharides (LBP) on cell survival rate of RGM-1 cells. CON: control group, A: aspirin-induced group, C: CPC treated group, L: LBP treated group. Data are mean  $\pm$  SD ( $n = 6$ ). There were no significant differences between any two groups ( $p > 0.05$ ).
